# Supplementary material for: Daily enteral feeding practice on the ICU: attainment of goals and interfering factors
Source: Springer Nature journal article supplement (doi:10.1186/cc3504), 2005-03-22
Supplement: Additional file 1 [file cc3504-s1.pdf]

Additional file

Protocol outline: enteral nutrition in the ICU

| <b>Criterion</b>                                          | <b>Action</b>                                                                       |
|-----------------------------------------------------------|-------------------------------------------------------------------------------------|
| Feeding schedule                                          | Start 20 ml / hour<br>Increase 20 ml per day (day 1 to 5)<br>Optimal 100 ml per day |
| EN* in first 12 hour                                      | GR <sup>†</sup> every 3 hours                                                       |
| GR < 200 ml                                               | GR every 6 hours                                                                    |
| GR < 200 ml                                               | Return GR to the patient                                                            |
| GR > 200 ml                                               | Discard GR, consult intensivist to start prokinetics                                |
| Prokinetics > 12 hours                                    | GR > 200 reduce EN rate                                                             |
| Prokinetics and reduced EN rate and GR > 200 ml / 6 hours | Place duodenal tube                                                                 |
| EN visible in month                                       | Stop EN                                                                             |
| Patient is vomiting                                       | Stop EN                                                                             |
| Symptoms of aspiration                                    | Stop EN                                                                             |

\* EN: Enteral Nutrition; <sup>†</sup> GR: Gastric Retention
